# Supplementary material for: Differential Association of the Conserved SUMO Ligase Zip3 with Meiotic Double-Strand Break Sites Reveals Regional Variations in the Outcome of Meiotic Recombination
Source: PLoS Genet. 2013 Apr 4;9(4):e1003416. doi: 10.1371/journal.pgen.1003416 (PMC3616913; doi:10.1371/journal.pgen.1003416)
Supplement: Table S1 — Effects of the zip3-4AQ mutation on genetic distances in intervals along three chromosomes. Map distances and standard errors (in centiMorgans; cM) were calculated from parental ditypes (PD), non-parental ditypes (NPD) and tetratypes (T) as described in the Materials and Methods. P values are for G tests performed on parental ditype, non-parental ditype, and tetratype segregation patterns for pairwise comparison between wild-type ZIP3-Flag and the zip3-4AQ-Flag mutant. Same strains as in Figure 5D. (XLSX) [file pgen.1003416.s015.xlsx]

## Sheet: Feuil1
		his4-leu2	leu2-CEN3	CEN3-MAT	lys5-met13	met13-cyh2	cyh2-trp5	CEN8-arg4	arg4-thr1	thr1-cup1
Wild Type	P:NPD:T	263:2:94	13 days, 20:02:37	265:9:107	204:2:136	278:0:78	138:6:226	296:0:80	12 days, 6:00:54	173:6:147
	cM	14.76±1.3	6.6±1.36	21.12±2.5	21.63±1.75	10.95±1.09	35.4±2.1	10.63±1.05	7.75±0.97	28.06±2.47
zip3-4AQ	P:NPD:T	297:1:69	14 days, 7:00:39	307:1:94	182:4:165	295:1:85	158:9:231	14 days, 6:00:53	13 days, 3:00:43	173:3:172
	cM	10.2±1.09	5.1±0.77	12.43±1.27	26.92±2.05	11.94±1.3	35.80±1.4	6.7±0.85	6±0.85	27.29±1.9
